# Supplementary material
Source: HighWire-hosted journal article supplement (https://bmjopen.bmj.com/content/10/9/e036024)
Supplement: inline-supplementary-material-1 [file inline-supplementary-material-1.pdf]

**Appendix A Topics in interview guide**

- Decision-making whether to participate in the ProtecT study
- Experiences of the diagnostic process
- Impact of prostate cancer diagnosis at time of diagnosis and ongoing
- Decision-making whether to accept random allocation to a treatment or to choose a treatment
- Views and experiences of AM and changes over time
- Views on radical treatments
- Decision-making whether to initiate radical treatment (if applicable)
- Experiences of radical treatment and its sequelae (if applicable)
